# Supplementary material for: A series of codendrimers from polyamidoamine (PAMAM) and oligoethylene glycols (OEG) dendrons as drug carriers: the effect of OEG dendron decoration degree
Source: Royal Society of Chemistry journal article supplement (doi:10.1039/c5ra12177a), 2015-01-01
Supplement: c5ra12177a1.pdf [file c5ra12177a1.pdf]

## Supporting Information

### A series of codendrimers from polyamidoamine (PAMAM) and oligoethylene glycols (OEG) dendrons as drug carriers: The effects of OEG dendron decorated degree

Yanna Zhao,<sup>a</sup> Jing Zhao,<sup>b</sup> Ran Li,<sup>a</sup> Meihua Han,<sup>a</sup> Chunyan Zhu,<sup>a</sup> Mincan Wang,<sup>b</sup> Yifei Guo,<sup>\*a</sup> and Xiangtao Wang<sup>\*a</sup>

<sup>a</sup> Institute of Medicinal Plant Development, Chinese Academy of Medical Sciences & Peking Union Medical College, Beijing 100193, P. R. China. E-mail: ffguo@163.com, xtaowang@163.com; Fax: +86-10-57833266; Tel: +86-10-57833266

<sup>b</sup> The College of Chemistry and Molecular Engineering, Zhengzhou University, Zhengzhou, Henan Province 450052, P. R. China

**Table S1** Properties of drug-loaded nanoparticles

| Entries                           | EE <sup>a</sup><br>(%) | DLC<br>(%) | D <sub>h</sub> <sup>b</sup><br>(nm) |
|-----------------------------------|------------------------|------------|-------------------------------------|
| D <sub>64</sub> -MTX <sup>c</sup> | 46.6 ± 3.2             | 18.9 ± 1.0 | 98.0 ± 7.2                          |
| D <sub>48</sub> -MTX              | 51.1 ± 3.1             | 20.4 ± 1.0 | 110.7 ± 0.6                         |
| D <sub>32</sub> -MTX              | 79.6 ± 1.0             | 28.5 ± 0.4 | 117.2 ± 4.7                         |
| D <sub>16</sub> -MTX              | 85.4 ± 0.3             | 29.9 ± 0.1 | 117.1 ± 1.0                         |
| D <sub>64</sub> -HMM <sup>d</sup> | 10.8 ± 1.7             | 5.2 ± 0.5  | 160.9 ± 20.1                        |
| D <sub>48</sub> -HMM              | 13.0 ± 1.1             | 5.9 ± 0.5  | 146.4 ± 32.7                        |
| D <sub>32</sub> -HMM              | 11.6 ± 2.7             | 5.3 ± 1.1  | 135.7 ± 17.4                        |
| D <sub>16</sub> -HMM              | 11.3 ± 2.3             | 5.1 ± 1.0  | 210.8 ± 6.5                         |
| D <sub>64</sub> -RES <sup>e</sup> | 40.9 ± 0.6             | 16.9 ± 0.3 | 211.0 ± 3.4                         |
| D <sub>48</sub> -RES              | 37.5 ± 3.9             | 15.8 ± 1.4 | 512.0 ± 8.2                         |
| D <sub>32</sub> -RES              | 32.8 ± 1.8             | 14.1 ± 0.7 | 253.6 ± 16.2                        |
| D <sub>16</sub> -RES              | 36.3 ± 3.0             | 15.6 ± 1.2 | 177.2 ± 20.4                        |

<sup>a</sup> UV-HPLC detected, n = 3. <sup>b</sup> DLS detected, n = 3. <sup>c</sup> MTX-loaded nanoparticles. <sup>d</sup> HMM-loaded nanoparticles. <sup>e</sup> RES-loaded nanoparticles.

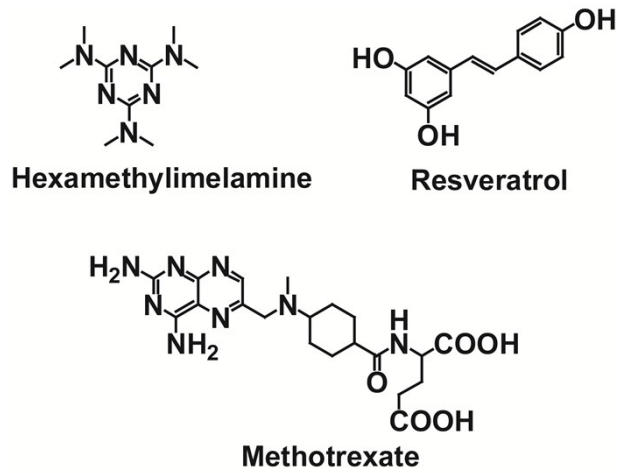

**Fig. S1** Structures of hydrophobic drugs.
